# Supplementary material
Source: PubMed Central journal article supplement (PMC3501120)
Supplement: Supp_Fig1.pdf [file Supp_Fig1.pdf]

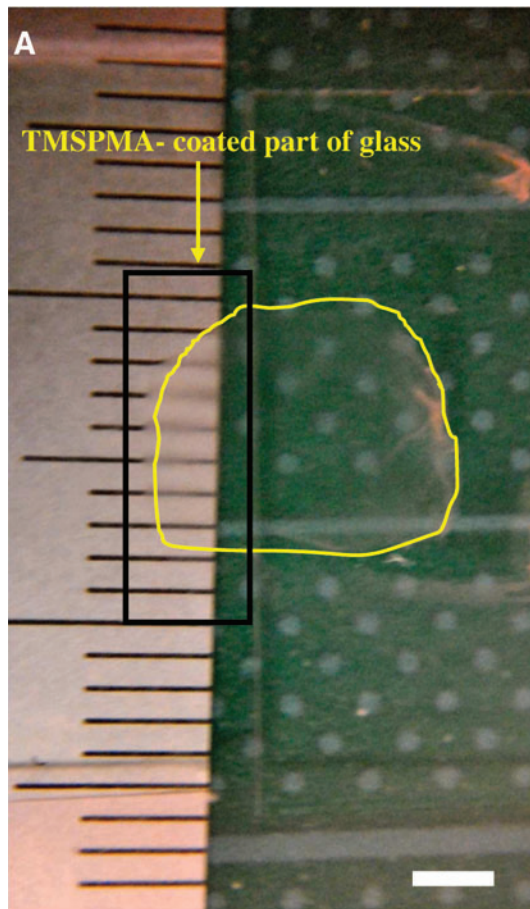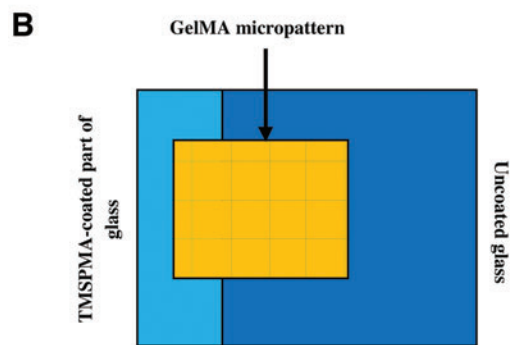

**SUPPLEMENTARY FIG. S1.** (A) A free-standing contractile muscle sheet containing aligned myotubes that were grown on the gelatin methacrylate (GelMA) hydrogel. The yellow line encircles the cell hydrogel tissue construct (scale bar, 2.5 mm). (B) Schematic of the hydrogel construct.
